# Supplementary material for: In vitro plant tissue culture as the fifth generation of bioenergy
Source: Sci Rep. 2022 Mar 23;12:5038. doi: 10.1038/s41598-022-09066-3 (PMC8943187; doi:10.1038/s41598-022-09066-3)
Supplement: Supplementary file 1 — Supplementary Information. [file 41598_2022_9066_MOESM1_ESM.docx]

**In vitro plant tissue culture as the fifth generation of bioenergy**

**Omid Norouzi1, Mohsen Hesami2, Marco Pepe2, Animesh Dutta1*, and Andrew Maxwell P. Jones2****1Mechanical Engineering Program, School of Engineering, University of Guelph, Guelph, Ontario N1G 2W1, Canada

2Gosling Research Institute for Plant Preservation, Department of Plant Agriculture, University of Guelph, Guelph, Ontario N1G 2W1, Canada

[* Corresponding authors:

Bioenergy (A. Dutta), Email: [adutta@uoguelph.ca](mailto:adutta@uoguelph.ca)

Plant tissue culture (A. M. P. Jones), Email: [amjones@uoguelph.ca](mailto:amjones@uoguelph.ca)]

Table S1. Constraints

| Name | Goal | Lower Limit | Upper Limit |
| --- | --- | --- | --- |
| A: Temperature | is in range | 250 | 350 |
| Gas | none | 22.91 | 39.16 |
| Biocrude | maximize | 12.64 | 28.2 |
| Aqueous | none | 9.65 | 19.16 |
| Hydrochar | minimize | 28.13 | 49.64 |

Table S2. Solutions

| Number | Temperature | Samples | Gas | Biocrude | Aqueous | Hydrochar | Desirability |
| --- | --- | --- | --- | --- | --- | --- | --- |
| **1** | **350.000** | **CL** | **38.357** | **22.612** | **10.552** | **28.480** | **0.794** |
| 2 | 350.000 | PL | 29.958 | 25.347 | 11.495 | 33.200 | 0.790 |
| 3 | 350.000 | CS | 39.557 | 18.597 | 11.309 | 30.538 | 0.583 |
| 4 | 350.000 | PS | 28.004 | 19.487 | 15.279 | 37.230 | 0.504 |
| 5 | 350.000 | CR | 37.029 | 16.069 | 14.264 | 32.638 | 0.417 |
| 6 | 350.000 | PR | 26.247 | 17.747 | 10.929 | 45.078 | 0.264 |

Table S3. Top chemical compounds identified in the bio-oils by GC–MS along with their most-likely biopolymer source.

| N | RT | Compound | Formula | Polymer | PL | PS | PR | CL | CS | CR |
| --- | --- | --- | --- | --- | --- | --- | --- | --- | --- | --- |
| 1 | 0.665 | Carbon dioxide | CO2 | Cellulose acetate; CA | 0.56 | 0.44 | 1.7 | 0.34 | 0.26 | 0.58 |
| 2 | 1.734 | Carbon dioxide | CO2 | Hydroxy butyl methyl cellulose | 19.83 | 28.25 | 35.07 | 34.48 | 18.39 | 17.91 |
| 3 | 2.732 | Acetic acid | C2H4O2 | Cellulose acetate; CA |  |  |  |  |  | 4.72 |
| 4 | 3.121 | Hydroxy acetone | C3H6O2 | Hydroxypropyl cellulose | 2.83 | 4.58 | 3.71 | 2.1 | 1.37 |  |
| 5 | 3.626 | 4,6-Dimethyl-2H-pyran-2-one | C7H8O2 | Cellulose acetate butyrate; CAB | 0.63 |  |  |  |  |  |
| 6 | 3.639 | 2-Furfural | C5H4O2 | Cellulose |  |  |  |  |  | 0.89 |
| 7 | 4.371 | 2-Hydroxyethyl acetate | C4H8O3 | Cellulose acetate butyrate; CAB |  |  | 1.64 |  |  |  |
| 8 | 4.371 | Toluene | C7H8 | Hexabromocyclododecane |  |  |  | 2.26 | 1.73 |  |
| 9 | 4.578 | Methyl pyruvate | C4H6O3 | Cellulose | 1.23 | 1.84 |  |  |  | 0.88 |
| 10 | 5.155 | 2-Furfural | C5H4O2 | Hydroxyethyl cellulose; HEC |  |  | 0.81 |  |  |  |
| 11 | 6.036 | m-Phenylenediamine | C6H8N2 | Polypyrrole |  |  |  |  |  | 1.84 |
| 12 | 6.062 | Ketene | C2H2O | Poly (vinyl acetate) |  |  |  |  | 1.96 |  |
| 13 | 6.185 | 5-Methylfuran-2(3H)-one | C5H6O2 | Cellulose | 1.01 | 1.67 |  |  |  |  |
| 14 | 6.218 | Phenol | C6H6O | Cellulose acetate; CA |  |  | 2.42 | 2.28 | 3.41 |  |
| 15 | 7.209 | 1-Octene | C8H16 |  |  | 1.31 |  |  | 0.55 |  |
| 16 | 7.617 | p-Cresol | C7H8O | Oligomer of methylated phosphazene |  |  |  | 0.91 |  |  |
| 17 | 7.889 | Isobutenyl methyl ketone | C6H6O | 2,2,4,4-Tetramethyl-7-oxa-3,20-diazadispiro-[5.1.11.2]-heneicosan-21-one |  |  |  |  |  | 4.36 |
| 18 | 8.226 | n-Pentane | C5H12 |  | 0.77 |  |  |  |  |  |
| 19 | 8.239 | 1-Nonene | C9H18 |  |  | 0.53 |  |  |  |  |
| 20 | 8.369 | 2-Ethylphenol | C8H10O |  |  |  | 2.82 |  |  |  |
| 21 | 8.395 | 4-Ethylphenol | C8H10O | Polysulfone |  |  |  |  | 1.77 |  |
| 22 | 9.412 | Phenylacetonitrile | C8H7N |  | 0.58 |  |  | 1.41 | 1.39 |  |
| 23 | 9.522 | 2-Methoxy-4-vinylphenol | C9H10O2 | Lignin |  |  | 0.84 |  |  |  |
| 24 | 9.943 | Glutamic acid | C5H9NO4 |  |  | 0.99 |  |  |  |  |
| 25 | 10.358 | Dodecanal | C12H24O |  | 1.02 |  |  |  |  |  |
| 26 | 10.552 | Tridecanal | C13H26O |  |  |  |  | 0.75 |  |  |
| 27 | 10.559 | N,N-Dimethylhexadecylamine | C18H39N |  |  |  | 0.66 |  |  |  |
| 28 | 10.734 | Levoglucosan | C6H10O5 | Cellulose |  | 0.39 |  |  |  | 6.74 |
| 29 | 11.174 | Vinylsyringol | C10H12O3 | Lignin | 0.37 |  |  |  |  |  |
| 30 | 11.174 | 1-Dodecene | C12H24 |  |  |  |  |  |  | 0.44 |
| 31 | 11.589 | Levoglucosan | C6H10O5 | Cellulose | 6.83 |  |  |  |  |  |
| 32 | 12.153 | Aniline | C6H7N |  |  |  |  | 1.24 |  |  |
| 33 | 12.153 | Diphenol | C12H10O2 |  |  | 0.41 |  |  |  | 0.91 |
| 34 | 12.237 | 1-Dodecene | C12H24 |  |  | 0.91 |  |  |  |  |
| 35 | 12.25 | Levoglucosan | C6H10O5 | Novon | 0.82 |  |  |  |  |  |
| 36 | 12.399 | 4-Ethylphenol | C8H10O |  |  |  |  |  | 1.09 |  |
| 37 | 12.665 | 1,15-Hexadecadiene | C16H30 | Glycerides, | 3.59 |  |  |  |  |  |
| 38 | 13.28 | Palmitic acid | C16H32O2 |  | 3.25 | 1.56 | 2.34 | 1.58 | 1.14 | 1.02 |
| 39 | 14.142 | Methyl 9,12-octadecadienoate | C19H34O2 | Methyl O-acetylricinolate |  |  |  |  |  | 0.48 |
| 40 | 14.181 | C16H26 (tetramer) | C16H26 |  | 2.04 |  |  |  |  |  |
| 41 | 14.187 | 1,7-Octadiene | C8H14 |  |  | 1.36 |  | 1.2 | 0.85 |  |
| 42 | 14.874 | 1-Tridecene | C13H26 |  |  |  | 1.04 |  |  |  |
| 43 | 15.004 | Oleic acid | C18H34O2 |  |  |  |  | 0.32 |  |  |
| 44 | 15.548 | 4,6-Bis(tert-pentyl)-2-vinylphenol | C18H28O |  | 1.14 |  |  |  |  |  |
| 45 | 15.632 | Methyl 9,12-octadecadienoate | C19H34O2 |  |  | 0.3 |  |  |  |  |
| 46 | 15.671 | C12H18 (trimer) | C12H18 |  |  |  |  |  | 0.18 |  |
| 47 | 15.788 | 1-Dodecene | C12H24 |  |  |  |  | 0.29 |  |  |
| 48 | 15.95 | 2,5-Di-tert-butylhydroquinone | C14H22O2 |  |  |  | 0.69 |  |  |  |
| 49 | 16.475 | 1-Tetracontene | C40H80 |  | 0.45 |  |  |  |  |  |
| 50 | 16.52 | C16H26 (tetramer) | C16H26 |  |  |  |  |  | 0.33 |  |
| 51 | 17.019 | 5-Hexene-1,3,5-triyltribenzene | C24H24 |  |  | 0.33 |  |  |  |  |
| 52 | 17.304 | n-Hentriacontane [CH3(CH2)29CH3] | C31H64 |  | 1.31 |  |  |  |  |  |
| 53 | 17.382 | Hexamethylcyclotrisiloxane | C6H18O3Si3 |  |  |  | 1.72 |  |  |  |
| 54 | 18.25 | 2,5-Di-tert-butylhydroquinone | C14H22O2 |  | 0.38 |  |  |  |  |  |
| 55 | 18.639 | Hexamethylcyclotrisiloxane | C6H18O3Si3 |  |  |  | 3.71 |  |  |  |
| 56 | 18.736 | alpha-Tocopherol | C29H50O2 |  | 2.67 |  |  |  |  |  |
| 57 | 18.762 | 2,5-Di-tert-butylhydroquinone | C14H22O2 |  |  |  |  | 0.43 | 0.27 |  |
| 58 | 19.65 | Palmitic acid | C16H32O2 |  |  |  |  | 0.57 |  |  |
| 59 | 19.876 | Hexamethylcyclotrisiloxane | C6H18O3Si3 |  |  |  |  |  | 0.36 |  |
| 60 | 20.343 | 2,5-Di-tert-butylhydroquinone | C14H22O2 |  | 1.5 |  | 1.24 |  |  | 0.4 |
| 61 | 20.349 | C16H26 (tetramer) | C16H26 |  |  | 2.17 | 0.39 | 2.98 | 2.07 |  |
| 62 | 23.634 | Hexamethylcyclotrisiloxane | C6H18O3Si3 |  | 1.19 |  |  |  |  |  |
| 63 | 23.634 | 2,5-Di-tert-butylhydroquinone | C14H22O2 |  |  |  |  | 0.53 |  |  |
